# Supplementary material for: Do Subjects from Different Occupational Groups Experience Dental Fear and Anxiety Equally?
Source: MDPI journal article supplement (doi:10.3390/medicina60040674), 2024-04-21
Supplement: s1 [file s1]

A: Physicians

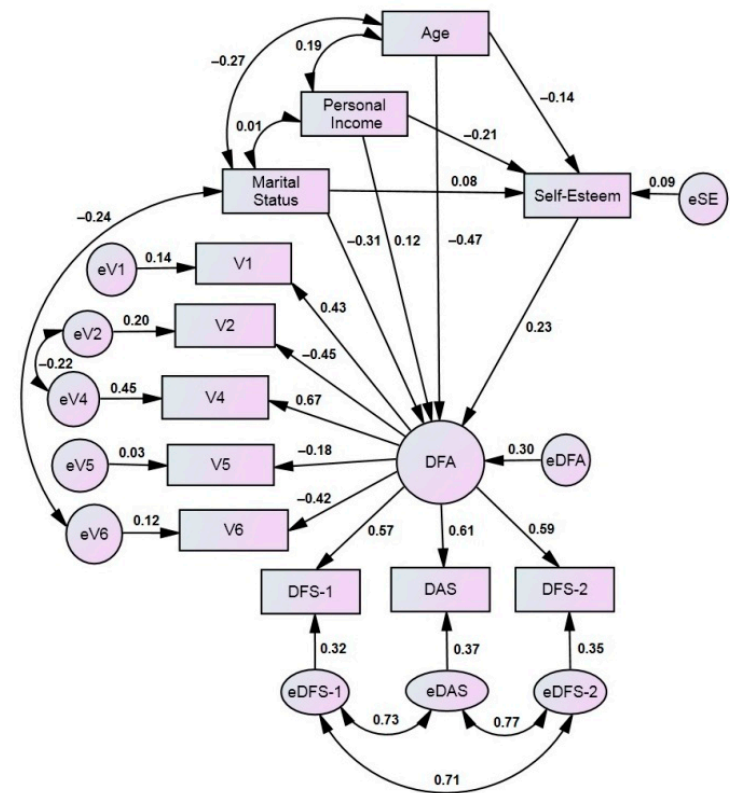

B: Teachers

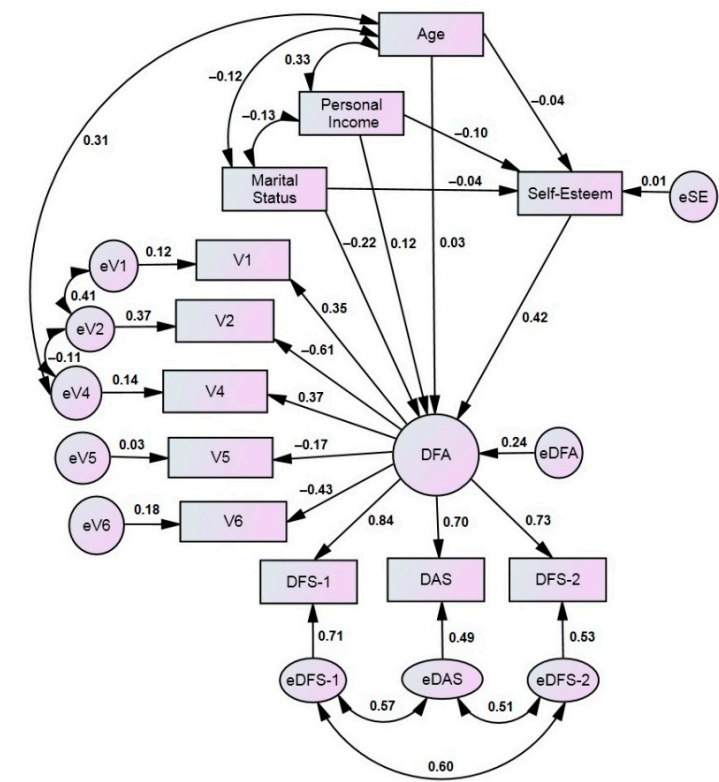

### C: Industry workers

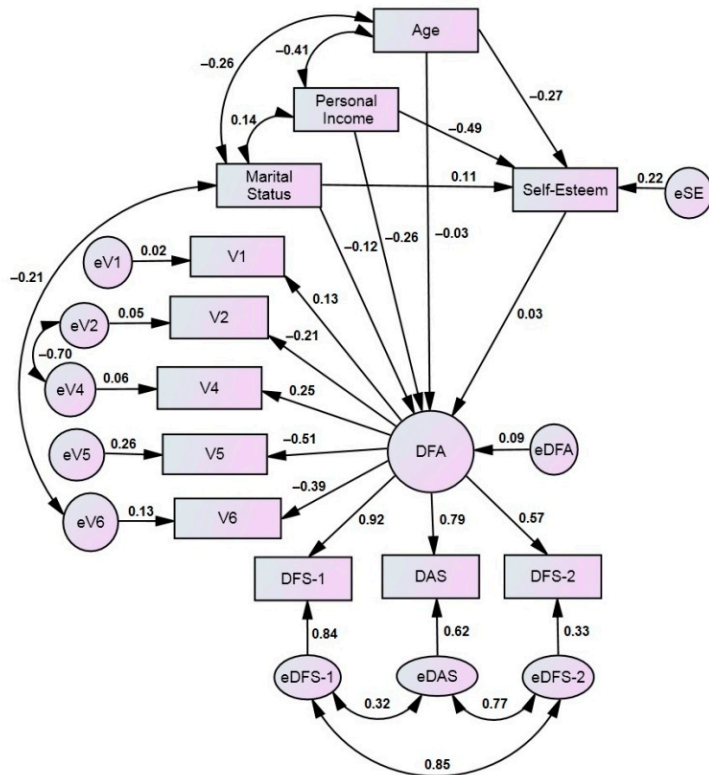

### D: Artists

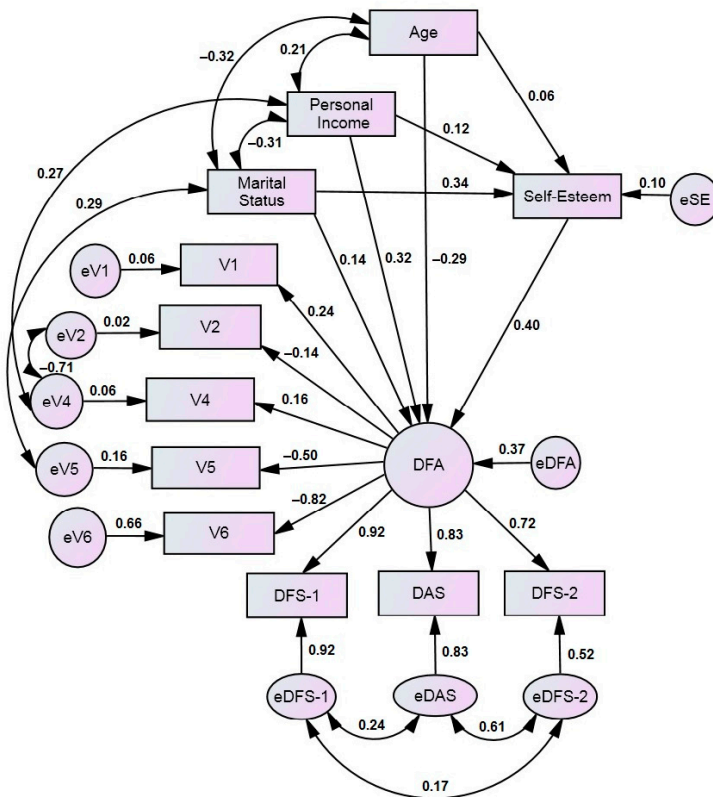

**Figure S1.** Path diagrams with standardized estimates of the model, by respondents' occupational group: A: Physicians (n=162); B: Teachers (n=106); C: Industry workers (n=92); D: Artists (n=62). DFA: Latent variable of Dental Fear and Anxiety; DAS: Dental Anxiety Scale; DFS: Dental Fear Survey; V1: Frequency of dental visits; V2: Self-reported decayed teeth; V4: Satisfied with the teeth; V5 unpleasant dental experiences; V6: requests for dental sedation.
